# Supplementary material
Source: Springer Nature journal article supplement (https://www.springermedizin.de/resource/supplementary/12885_2008_1299_MOESM1_ESM.pdf/9471686)
Supplement: MOESM1 [file 9471686]

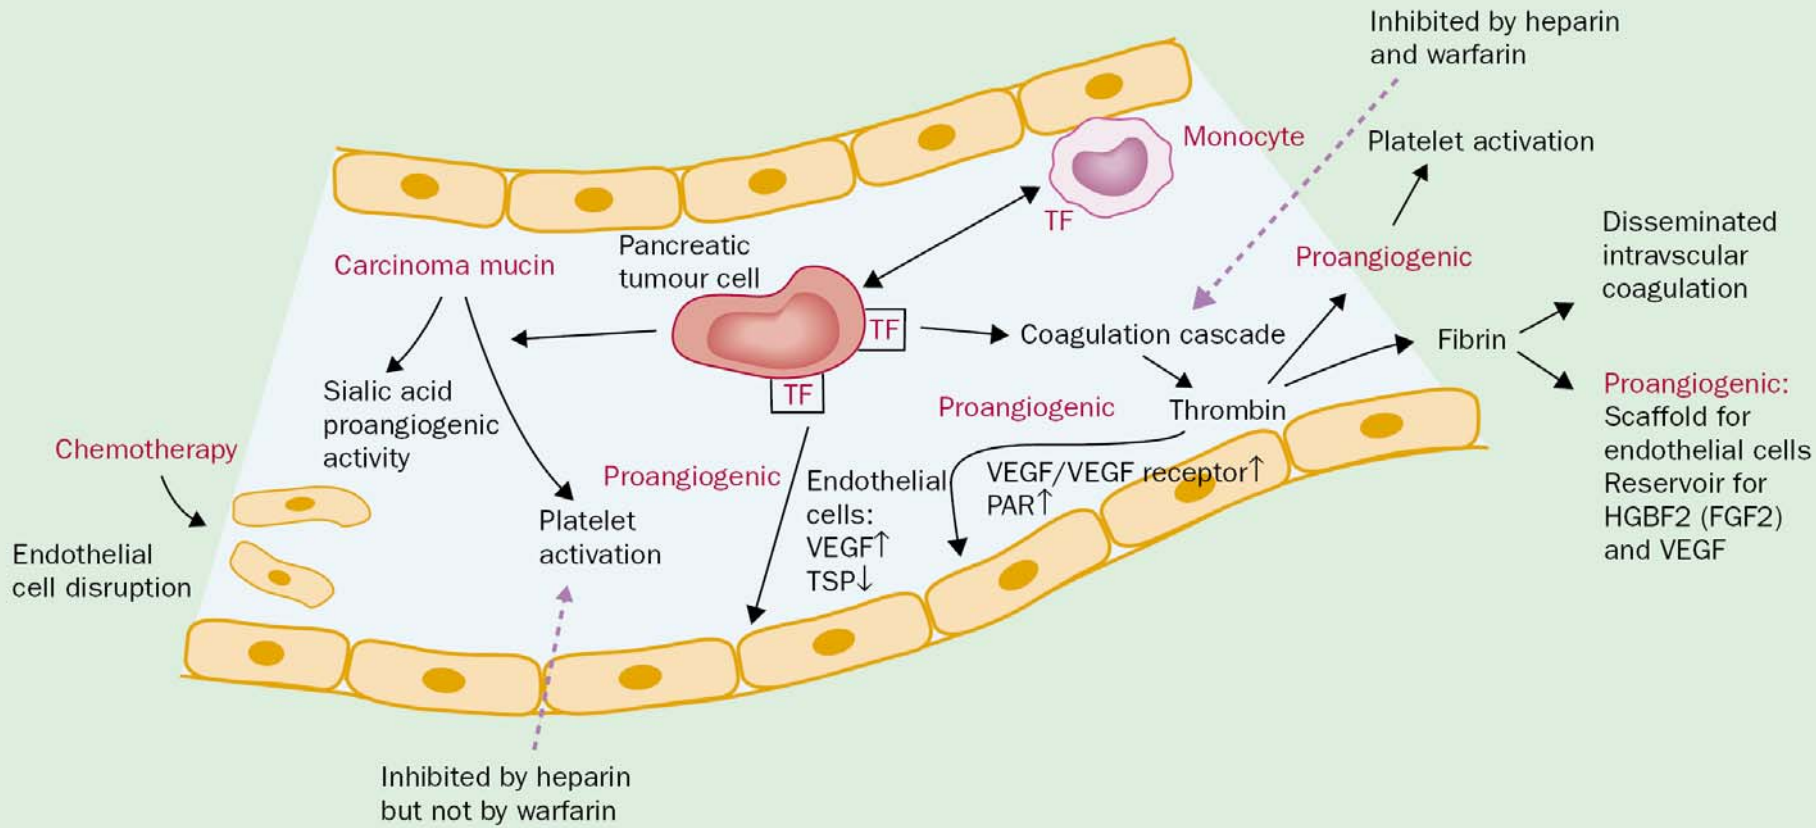

Carcinoma mucin

Pancreatic tumour cell

Monocyte

TF

TF

TF

Coagulation cascade

Proangiogenic

Fibrin

Thrombin

Disseminated intravascular coagulation

**Proangiogenic:**  
Scaffold for endothelial cells  
Reservoir for HGBF2 (FGF2) and VEGF

Inhibited by heparin and warfarin

Platelet activation

Sialic acid proangiogenic activity

Proangiogenic

Endothelial cells:  
VEGF $\uparrow$   
TSP $\downarrow$

VEGF/VEGF receptor $\uparrow$   
PAR $\uparrow$

Platelet activation

Inhibited by heparin but not by warfarin

Chemotherapy

Endothelial cell disruption
